# Supplementary material for: The effects of extended photoperiod and warmth on hair growth in ponies and horses at different times of year
Source: PLoS One. 2020 Jan 14;15(1):e0227115. doi: 10.1371/journal.pone.0227115 (PMC6959597; doi:10.1371/journal.pone.0227115)
Supplement: S1 Tables — Data include hair length, hair weight and coat scores for all individuals from study 1. (XLSX) [file pone.0227115.s001.xlsx]

## Sheet: Hair Length
Single hair length (mm)				M = Mare		G = Gelding
	Treatment Horses				Treatment Ponies			Control Horses			Control Ponies
Date	Sunny (G)	Bobby (G)	Biskit (M)	Shadow (M)	Holly (M)	Suzie (M)	Angel (M)	Levi (G)	Elmo (G)	Alfie (G)	Jasper (G)	Yogi (G)	Bella (M)	Cloud (M)
2016-09-21	13	12	15	10	15	16	15	9	18	12	9	20	20	25
2016-09-21	14	15	12	8	14	16	12	9	18	12	11	14	20	23
2016-09-21	13	13	14	11	13	15	12	10	18	10	10	16	24	20
2016-09-21	14	13	15	11	14	16	15	9	19	15	15	20	24	26
2016-09-21	15	13	14	11	13	16	11	9	18	15	10	18	17	23
2016-09-21	13	20	13	12	13	16	12	10	17	13	12	19	19	22
2016-09-21	10	15	14	10	14	15	13	10	19	13	15	18	20	26
2016-09-21	15	16	12	12	13	16	19	9	18	15	12	19	21	25
2016-09-21	15	16	12	9	13	16	14	10	18	14	15	15	19	26
2016-09-21	14	15	13	10	15	15	12	13	18	13	15	20	27	23
Average	13.6	14.8	13.4	10.4	13.7	15.7	13.5	9.8	18.1	13.2	12.4	17.9	21.1	23.9
2016-10-03	17	20	19	11	17	18	23	16	21	18	20	21	17	33
2016-10-03	18	23	23	14	17	13	22	14	20	20	19	22	21	29
2016-10-03	15	22	19	14	20	17	22	16	18	20	20	23	16	30
2016-10-03	14	25	15	10	21	16	21	13	19	16	21	18	19	33
2016-10-03	17	25	18	14	20	15	22	11	19	16	19	21	21	28
2016-10-03	17	24	16	11	18	19	23	13	25	15	15	17	16	22
2016-10-03	14	23	19	14	21	22	22	15	19	16	15	20	16	28
2016-10-03	16	23	17	14	21	20	23	19	21	16	16	20	15	35
2016-10-03	15	21	17	13	19	16	25	19	22	14	20	22	18	34
2016-10-03	15	25	17	14	21	19	23	15	22	18	16	20	18	28
Average	15.8	23.1	18	12.9	19.5	17.5	22.6	15.1	20.6	16.9	18.1	20.4	17.7	30
2016-10-14	23	25	22	17	18	21	26	21	20	21	21	27	21	35
2016-10-14	23	24	24	14	17	18	26	21	20	22	20	24	20	38
2016-10-14	22	23	20	15	17	18	23	22	22	22	20	25	24	36
2016-10-14	23	29	26	14	23	17	22	20	20	21	24	26	22	36
2016-10-14	17	23	23	16	16	18	21	21	23	20	20	27	26	31
2016-10-14	23	25	17	13	20	18	22	21	21	17	23	25	21	32
2016-10-14	21	25	20	16	25	18	20	20	21	16	23	26	27	35
2016-10-14	23	21	21	14	24	17	21	21	22	23	21	26	23	33
2016-10-14	20	25	22	14	17	18	27	21	24	19	23	24	27	33
2016-10-14	22	26	24	14	20	16	26	21	20	21	24	25	25	31
Average	21.7	24.6	21.9	14.7	19.7	17.9	23.4	20.9	21.3	20.2	21.9	25.5	23.6	34
2016-10-28	27	30	28	17	26	21	29	21	25	27	25	32	33	33
2016-10-28	28	25	27	17	23	21	25	20	26	23	28	30	37	30
2016-10-28	26	22	26	16	25	22	30	21	29	24	25	29	35	32
2016-10-28	27	27	27	16	27	21	27	22	25	26	26	27	33	30
2016-10-28	25	26	26	15	25	19	31	23	25	26	26	27	35	32
2016-10-28	29	27	26	17	27	23	30	22	22	26	26	32	30	40
2016-10-28	25	28	23	19	23	26	26	22	25	26	25	27	34	33
2016-10-28	25	28	25	18	27	28	31	23	30	25	22	29	35	40
2016-10-28	25	25	26	20	25	20	27	23	20	27	26	24	33	38
2016-10-28	25	29	27	17	23	25	29	24	24	27	28	29	35	36
Average	26.2	26.7	26.1	17.2	25.1	22.6	28.5	22.1	25.1	25.7	25.7	28.6	34	34.4
2016-11-08	27	23	25	19	26	21	29	25	27	26	26	34	43	35
2016-11-08	26	25	32	20	24	32	28	23	26	25	28	30	34	37
2016-11-08	29	23	33	18	24	31	31	25	27	29	30	29	30	43
2016-11-08	25	25	30	19	25	22	27	25	32	30	29	27	37	30
2016-11-08	28	28	31	17	26	23	32	25	31	32	29	26	36	33
2016-11-08	29	27	31	17	25	20	31	24	31	28	30	31	33	36
2016-11-08	24	26	30	16	24	21	30	25	31	29	30	26	35	32
2016-11-08	30	28	29	17	28	24	31	25	28	30	25	32	35	36
2016-11-08	26	23	30	18	27	26	29	24	30	30	30	32	35	36
2016-11-08	28	26	32	17	23	28	33	25	35	28	29	33	32	36
Average	27.2	25.4	30.3	17.8	25.2	24.8	30.1	24.6	29.8	28.7	28.6	30	35	35.4

## Sheet: Hair Weight
Weight of 10 hairs (µg)					M = Mare		G = Gelding
	Treatment Horses				Treatment Ponies			Control Horses			Control Ponies
Date	Sunny (G)	Bobby (G)	Biskit (M)	Shadow (M)	Holly (M)	Suzie (M)	Angel (M)	Levi (G)	Elmo (G)	Alfie (G)	Jasper (G)	Yogi (G)	Bella (M)	Cloud (M)
2016-09-21	381.2	799.2	235	233.1	543.4	438.4	417.7	324.1	459	349	337.8	271.6	598.4	873.2
2016-10-03	496.9	892.9	483.2	319.5	707.8	502.6	672.3	400.2	765.2	463.5	543	379.7	665.8	1168.7
2016-10-14	765.4	981.4	534.5	318.3	721.8	545.7	866.9	533	864.2	538	570.4	492.4	727.7	1245.6
2016-10-28	957.3	1038.4	654	368.8	890.5	626	889.1	637.9	1040.4	724.4	862.4	759.1	861.4	1329.2
2016-11-08	1064.4	1167.6	727.1	358.4	978.4	840.5	1011.2	628.4	1453.6	839.4	794.8	653.4	1108.8	1651.9

## Sheet: Coat Scores
Coat scores			M = Mare		G = Gelding
			1 = Full Summer Coat			5 = Full Winter Coat
	Treatment Horses				Treatment Ponies			Control Horses			Control Ponies
Date	Sunny (G)	Bobby (G)	Biskit (M)	Shadow (M)	Holly (M)	Suzie (M)	Angel (M)	Levi (G)	Elmo (G)	Alfie (G)	Jasper (G)	Yogi (G)	Bella (M)	Cloud (M)
2016-09-21	2	1.5	2	2	2	2	2.5	1.5	2	1.5	2	2	2.5	3
2016-10-03	2.5	2	2.5	2	2.5	2	2	1.5	2	1.5	2	2	3	3
2016-10-14	1.5	2	1.5	1	2	1.5	2.5	1	2.5	1.5	2	2	3	3.5
2016-10-28	1.5	1.5	1.5	1.5	1.5	1.5	2	2	4	2.5	2.5	2.5	4	4
2016-11-08	2.5	2.5	2	1.5	1.5	2	2.5	2	3	2.5	2.5	3	4	4.5
